# Supplementary material for: Dissecting the genetics of the human transcriptome identifies novel trait-related trans-eQTLs and corroborates the regulatory relevance of non-protein coding loci
Source: PubMed Central journal article supplement — Hum Mol Genet. 2015 May 27;24(16):4746–63. doi: 10.1093/hmg/ddv194 (PMC4512630; doi:10.1093/hmg/ddv194), 2015-05-27
Supplement: supp_ddv194_ddv194supp_tables12.pdf [file supp_ddv194_ddv194supp_tables12.pdf]

Supplementary Table 12: Detailed documentation of annotation categories used for enrichment analyses of eQTNs.

| Annotation                                                                       | Abbreviation                                            | Source/URL                                                                                                                                                                                                                                                                        | Assembly    | Citation    | Comment                                                                                                                                                                                                                                                                                                       |
|----------------------------------------------------------------------------------|---------------------------------------------------------|-----------------------------------------------------------------------------------------------------------------------------------------------------------------------------------------------------------------------------------------------------------------------------------|-------------|-------------|---------------------------------------------------------------------------------------------------------------------------------------------------------------------------------------------------------------------------------------------------------------------------------------------------------------|
| Exons of short non-coding RNAs                                                   |                                                         |                                                                                                                                                                                                                                                                                   |             |             |                                                                                                                                                                                                                                                                                                               |
| Short RNAs                                                                       | miRNA precursors, snoRNAs(C/D box and H/ACA box snoRNA) | UCSC table browser (track: sno/miRNA)                                                                                                                                                                                                                                             | GRCh37/hg19 | [1, 2, 3]   | -                                                                                                                                                                                                                                                                                                             |
| long non-coding RNAs                                                             |                                                         |                                                                                                                                                                                                                                                                                   |             |             |                                                                                                                                                                                                                                                                                                               |
| Long non-coding RNAs(lncRNAs)                                                    | Gencode v13                                             | <a href="ftp://ftp.sanger.ac.uk/pub/gencode/release_13/gencode.v13.long_noncoding_RNAs.gtf.gz">ftp://ftp.sanger.ac.uk/pub/gencode/release_13/gencode.v13.long_noncoding_RNAs.gtf.gz</a>                                                                                           | GRCh37/hg19 | Gencode [4] | The original set of long non-coding RNAs as annotated in Gencode was reduced to a set of <i>bona fide</i> non-coding RNAs without any evidence for conserved ORFs (RNAcode [5]) nor exhibiting any sequence similarity to known amino acid sequences (RefSeq Mar 7 2012); categorized into exons and introns. |
| Large intergenic non-coding RNAs (lincRNAs)                                      | Cabili et al.                                           | <a href="http://www.broadinstitute.org/genome_bio/human_lincrnas/sites/default/files/lincRNA_catalog/lincRNAs_transcripts_stringentSet.bed">http://www.broadinstitute.org/genome_bio/human_lincrnas/sites/default/files/lincRNA_catalog/lincRNAs_transcripts_stringentSet.bed</a> | GRCh37/hg19 | [6]         | Stringent set; categorized into exons and introns.                                                                                                                                                                                                                                                            |
| LncRNadb                                                                         | lncRNadb                                                | <a href="http://lncrnadb.com">http://lncrnadb.com</a>                                                                                                                                                                                                                             | -           | [7]         | Coordinates in GRCh37/hg19 have been derived by BLAT [8] with paramters <code>-trimHardA -minIdentity=95</code> .                                                                                                                                                                                             |
| RNA transcripts found to be contained in chromatin                               |                                                         |                                                                                                                                                                                                                                                                                   |             |             |                                                                                                                                                                                                                                                                                                               |
| Transcript located in intergenic space                                           | CAR                                                     | -                                                                                                                                                                                                                                                                                 | NCBI36/hg18 | [9]         | Mapped to GRCh37/hg19 using liftOver [3].                                                                                                                                                                                                                                                                     |
| Transcript located in introns of protein-coding genes                            | CAR                                                     | -                                                                                                                                                                                                                                                                                 | NCBI36/hg18 | [9]         | Mapped to GRCh37/hg19 using liftOver [3].                                                                                                                                                                                                                                                                     |
| miRNAs target sites                                                              |                                                         |                                                                                                                                                                                                                                                                                   |             |             |                                                                                                                                                                                                                                                                                                               |
| conserved miRNA target sites                                                     | TsmiRNA                                                 | UCSC table browser (track:TS site)                                                                                                                                                                                                                                                | NCBI37/hg19 | [10]        | -                                                                                                                                                                                                                                                                                                             |
| Bona fide non-coding RNAs regulated in cell cycle, TP53 pathway or STAT3 pathway |                                                         |                                                                                                                                                                                                                                                                                   |             |             |                                                                                                                                                                                                                                                                                                               |

| Annotation                                                                                     | Abbreviation | Source/URL  | Assembly    | Citation                                | Comment                                                                                                                                                                                                                                                                                                                                       |
|------------------------------------------------------------------------------------------------|--------------|-------------|-------------|-----------------------------------------|-----------------------------------------------------------------------------------------------------------------------------------------------------------------------------------------------------------------------------------------------------------------------------------------------------------------------------------------------|
| Cell cycle                                                                                     | CC           | -           | hg19        | <i>Hackermüller et al.</i> <sup>1</sup> | Categorized according to transcript location, transcripts in intergenic space and transcript located in introns of protein-coding genes. Reduced to a set of <i>bona fide</i> non-coding RNAs without any evidence for conserved ORFs (RNAcode [5]) nor exhibiting any sequence similarity to known amino acid sequences (RefSeq Mar 7 2012). |
| Tumor protein 53 gene                                                                          | TP53         | -           | hg19        | <i>Hackermüller et al.</i> <sup>1</sup> | Categorized according to transcript location, transcripts in intergenic space and transcript located in introns of protein-coding genes. Reduced to a set of <i>bona fide</i> non-coding RNAs without any evidence for conserved ORFs (RNAcode [5]) nor exhibiting any sequence similarity to known amino acid sequences (RefSeq Mar 7 2012). |
| Signal transducer and activator of transcription 3                                             | STAT3        | -           | hg19        | <i>Hackermüller et al.</i> <sup>1</sup> | Categorized according to transcript location, transcripts in intergenic space and transcript located in introns of protein-coding genes. Reduced to a set of <i>bona fide</i> non-coding RNAs without any evidence for conserved ORFs (RNAcode [5]) nor exhibiting any sequence similarity to known amino acid sequences (RefSeq Mar 7 2012). |
| Bona fide non-coding genomic regions predicted to contain conserved secondary structure motifs |              |             |             |                                         |                                                                                                                                                                                                                                                                                                                                               |
| RNAz                                                                                           | RNAz         | -           | GRCh37/hg19 | <i>Smith et al.</i> <sup>2</sup>        | Categorized according to intronic and intergenic space.                                                                                                                                                                                                                                                                                       |
| SISSIz                                                                                         | SISSIz       | -           | GRCh37/hg19 | <i>Smith et al.</i> <sup>2</sup>        | Categorized according to intronic and intergenic space.                                                                                                                                                                                                                                                                                       |
| Protein-coding gene annotation                                                                 |              |             |             |                                         |                                                                                                                                                                                                                                                                                                                                               |
| Coding exons                                                                                   | CDS          | Gencode v13 | GRCh37/hg19 | Gencode [4]                             | -                                                                                                                                                                                                                                                                                                                                             |

<sup>1</sup>Hackermüller J et al. "Cell cycle, oncogenic and tumor suppressor pathways regulate numerous long and macro RNAs." submitted.

<sup>2</sup>Smith MA, Gesell T, Stadler PF, Mattick JS. "Widespread Purifying Selection on RNA Structure in Mammals". submitted

| Annotation                                      | Abbreviation    | Source/URL                                                                                                                                                                                                                                                        | Assembly    | Citation         | Comment                                                                                                        |
|-------------------------------------------------|-----------------|-------------------------------------------------------------------------------------------------------------------------------------------------------------------------------------------------------------------------------------------------------------------|-------------|------------------|----------------------------------------------------------------------------------------------------------------|
| Introns                                         | intron          | Gencode v13                                                                                                                                                                                                                                                       | GRCh37/hg19 | Gencode [4]      | Defined as intronic nucleotides which do not overlap any exon of a protein-coding transcript annotation.       |
| Intergenic                                      | intergenic      | Gencode v13                                                                                                                                                                                                                                                       | GRCh37/hg19 | Gencode [4]      | Defined as the complement of all known protein-coding transcript annotation.                                   |
| UTRs                                            | UTRs            | Gencode v13                                                                                                                                                                                                                                                       | GRCh37/hg19 | Gencode [4]      | -                                                                                                              |
| Pseudogenes                                     |                 |                                                                                                                                                                                                                                                                   |             |                  |                                                                                                                |
| Pseudogenes                                     | Gencode v13     |                                                                                                                                                                                                                                                                   | GRCh37/hg19 | -                | -                                                                                                              |
| Novel transcripts with putative coding function |                 |                                                                                                                                                                                                                                                                   |             |                  |                                                                                                                |
| Transcripts of uncertain coding potential       | TUCP            | <a href="http://www.broadinstitute.org/genome_bio/human_lincrnas/sites/default/files/TUCP_transcripts_catalog/TUCP_transcripts.gtf">http://www.broadinstitute.org/genome_bio/human_lincrnas/sites/default/files/TUCP_transcripts_catalog/TUCP_transcripts.gtf</a> | GRCh37/hg19 | [6]              | Categorized according to intronic and intergenic space.                                                        |
| RNAcode                                         | RNAcode         | -                                                                                                                                                                                                                                                                 | GRCh37/hg19 | [11, 12, 13, 14] | Predicted ORF in intergenic space.                                                                             |
| Regulatory sites                                |                 |                                                                                                                                                                                                                                                                   |             |                  |                                                                                                                |
| CpG islands                                     | CpG islands     | UCSC table browser (track: CpG islands)                                                                                                                                                                                                                           | NCBI37/hg19 | [10]             | -                                                                                                              |
| Most conserved sequences                        | MCS             | UCSC table browser (track: MCS)                                                                                                                                                                                                                                   | NCBI37/hg19 | [10]             | -                                                                                                              |
| Open source for Regulatory Annotation           | OregAnno        | UCSC table browser (track: OregAnno)                                                                                                                                                                                                                              | NCBI37/hg19 | [10]             | -                                                                                                              |
| Promoter regions                                |                 |                                                                                                                                                                                                                                                                   | GRCh37/hg19 |                  | Defined as 2kb and 5kb upstream of 5'UTR.                                                                      |
| H3K4 trimethylation                             | H3K4me3         | <a href="ftp://hgdownload.cse.ucsc.edu/goldenPath/hg18/encodeDCC/wgEncodeBroadChIPSeq/">ftp://hgdownload.cse.ucsc.edu/goldenPath/hg18/encodeDCC/wgEncodeBroadChIPSeq/</a>                                                                                         | NCBI36/hg18 | [15, 3]          | Chromatin-mark associated with promoter sites [16, 17]. Mapped to GRCh37/hg19 using <code>liftOver</code> [3]. |
| DNaseI-hypersensitive sites                     | DNaseI          | UCSC table browser (track: Dnase Clusters)                                                                                                                                                                                                                        | GRCh37/hg19 | [15, 3]          | Associated with transcription factor binding sites [17, 18].                                                   |
| Transcription factor binding sites (TFBs)       | TFBs (Encode)   | UCSC table browser (track: Txn Factor ChIP)                                                                                                                                                                                                                       | GRCh37/hg19 | [15, 3]          | Binding sites identified by ChIP-seq [15].                                                                     |
| Transcription factor binding sites (TFBs)       | TFBs (Transfac) | UCSC table browser (track: TFBS Conserved)                                                                                                                                                                                                                        | GRCh37/hg19 | [19, 3]          | Binding sites conserved in human, mouse and rat from Transfac Matrix Database (v7.0) [19].                     |

| Annotation           | Abbreviation | Source/URL                                                                    | Assembly    | Citation | Comment                                                                                                                |
|----------------------|--------------|-------------------------------------------------------------------------------|-------------|----------|------------------------------------------------------------------------------------------------------------------------|
| Pol-II binding sites | Pol-II       | ftp://hgdownload.cse.ucsc.edu/goldenPath/hg18/encodeDCC/wgEncodeBroadChIPseq/ | NCBI36/hg18 | [15, 3]  | Pol-II binding sites derived by ChIP-seq [15]. Mapped to GRCh37/hg19 using liftOver [3].                               |
| H3K36 trimethylation | H3K36me3     | ftp://hgdownload.cse.ucsc.edu/goldenPath/hg18/encodeDCC/wgEncodeBroadChIPseq/ | NCBI36/hg18 | [15, 3]  | Chromatin-mark associated with active regions of Pol-II transcripts [20]. Mapped to GRCh37/hg19 using liftOver [3].    |
| H3K27 trimethylation | H3K27me3     | ftp://hgdownload.cse.ucsc.edu/goldenPath/hg18/encodeDCC/wgEncodeBroadChIPseq/ | NCBI36/hg18 | [15, 3]  | Chromatin-mark associated with repressed regions of Pol-II transcripts [21]. Mapped to GRCh37/hg19 using liftOver [3]. |
| H3K4 monomethylation | H3K4me1      | ftp://hgdownload.cse.ucsc.edu/goldenPath/hg18/encodeDCC/wgEncodeBroadChIPseq/ | NCBI36/hg18 | [15, 3]  | Chromatin-mark associated with enhancer regions [22, 17]. Mapped to GRCh37/hg19 using liftOver [3].                    |
| H3K27 acetylation    | H3K27ac      | ftp://hgdownload.cse.ucsc.edu/goldenPath/hg18/encodeDCC/wgEncodeBroadChIPseq/ | NCBI36/hg18 | [15, 3]  | Chromatin-mark associated with enhancer and promoter sites [15, 23, 24]. Mapped to GRCh37/hg19 using liftOver [3].     |

## References

- [1] Lestrade L, Weber MJ (2006) snoRNA-LBME-db, a comprehensive database of human H/ACA and C/D box snoRNAs. *Nucleic Acids Res* 34: D158–D162.
- [2] Griffiths-Jones S (2004) The microRNA Registry. *Nucleic Acids Res* 32: D109–D111.
- [3] Kuhn RM, Haussler D, Kent WJ (2012) The UCSC genome browser and associated tools. *Brief Bioinformatics* .
- [4] Harrow J, Frankish A, Gonzalez JM, Tapanari E, Diekhans M, et al. (2012) GENCODE: the reference human genome annotation for The ENCODE Project. *Genome Res* 22: 1760–1774.
- [5] Washietl S, Findeiss S, Miller SA, Kalkhof S, von Bergen M, et al. (2011) RNAcode: robust discrimination of coding and noncoding regions in comparative sequence data. *RNA* 17: 578–594.
- [6] Cabili MN, Trapnell C, Goff L, Koziol M, Tazon-Vega B, et al. (2011) Integrative annotation of human large intergenic noncoding RNAs reveals global properties and specific subclasses. *Genes Dev* 25: 1915–1927.
- [7] Amaral P, Clark M, Gascoigne D, Dinger M, Mattick J (2011) Incrnadb: a reference database for long noncoding rnas. *Nucleic Acids Res* 39: D146–D151.
- [8] Kent WJ (2002) BLAT—the BLAST-like alignment tool. *Genome Res* 12: 656–664.
- [9] Mondal T, Rasmussen M, Pandey GK, Isaksson A, Kanduri C (2010) Characterization of the rna content of chromatin. *Genome Res* 20: 899–907.
- [10] Meyer LR, Zweig AS, Hinrichs AS, Karolchik D, Kuhn RM, et al. (2012) The UCSC genome browser database: extensions and updates 2013. *Nucleic Acids Res* .
- [11] Gruber AR, Neubck R, Hofacker IL, Washietl S (2007) The RNAz web server: prediction of thermodynamically stable and evolutionarily conserved RNA structures. *Nucleic Acids Res* 35: W335–W338.
- [12] Gruber AR, Bernhart SH, Hofacker IL, Washietl S (2008) Strategies for measuring evolutionary conservation of RNA secondary structures. *BMC Bioinformatics* 9: 122.
- [13] Gruber A, Findeiss S, Washietl S, Hofacker I, Stadler P (2010) RNAz 2.0: Improved noncoding RNA detection. In: PSB in press.
- [14] Gruber AR, Findei S, Washietl S, Hofacker IL, Stadler PF (2010) RNAZ 2.0: IMPROVED NON-CODING RNA DETECTION. *Pac Symp Biocomput* 15: 69–79.
- [15] Birney E, Stamatoyannopoulos J, Dutta A, Guigo R, Gingeras T, et al. (2007) Identification and analysis of functional elements in 1by the encode pilot project. *Nature* 447: 799–816.
- [16] Roh TY, Cuddapah S, Cui K, Zhao K (2006) The genomic landscape of histone modifications in human T cells. *Proc Natl Acad Sci U S A* 103: 15782–15787.
- [17] Bulger M, Groudine M (2010) Enhancers: the abundance and function of regulatory sequences beyond promoters. *Dev Biol* 339: 250–257.
- [18] Xi H, Shulha HP, Lin JM, Vales TR, Fu Y, et al. (2007) Identification and characterization of cell type-specific and ubiquitous chromatin regulatory structures in the human genome. *PLoS Genet* 3: e136.

- [19] Wingender E, Chen X, Hehl R, Karas H, Liebich I, et al. (2000) TRANSFAC: an integrated system for gene expression regulation. *Nucleic Acids Res* 28: 316–319.
- [20] Mikkelsen TS, Ku M, Jaffe DB, Issac B, Lieberman E, et al. (2007) Genome-wide maps of chromatin state in pluripotent and lineage-committed cells. *Nature* 448: 553–560.
- [21] Barski A, Cuddapah S, Cui K, Roh TY, Schonnes DE, et al. (2007) High-resolution profiling of histone methylations in the human genome. *Cell* 129: 823–837.
- [22] Heintzman ND, Stuart RK, Hon G, Fu Y, Ching CW, et al. (2007) Distinct and predictive chromatin signatures of transcriptional promoters and enhancers in the human genome. *Nat Genet* 39: 311–318.
- [23] Terrenoire E, McRonald F, Halsall JA, Page P, Illingworth RS, et al. (2010) Immunostaining of modified histones defines high-level features of the human metaphase epigenome. *Genome Biol* 11: R110.
- [24] Shin JH, Li RW, Gao Y, Baldwin R 6th, Li Cj (2012) Genome-wide ChIP-seq mapping and analysis reveal butyrate-induced acetylation of H3K9 and H3K27 correlated with transcription activity in bovine cells. *Funct Integr Genomics* 12: 119–130.
